# Supplementary material for: Iron oxide encapsulated by copper-apatite: an efficient magnetic nanocatalyst for N-arylation of imidazole with boronic acid
Source: Royal Society of Chemistry journal article supplement (doi:10.1039/c9ra06991g), 2019-01-01
Supplement: c9ra06991g1.pdf [file c9ra06991g1.pdf]

## Supplementary Information for

### Iron Oxide Encapsulated by Copper-apatite: An efficient Magnetic Nanocatalyst for *N*-arylation of Imidazole with Boronic acid

Othmane Amadine,<sup>a\*</sup> Younes Essamlali,<sup>a</sup> Abdallah Amedlous,<sup>a,b</sup> Mohamed

Zahouily <sup>a,b\*\*</sup>

a VARENA Center, MASCIR Foundation, Rabat Design, Rue Mohamed El Jazouli, Madinat El Irfane, 10100-Rabat, Morocco. E-mail: m.zahouily@mascir.com

b Laboratoire de Matériaux, Catalyse et Valorisation des Ressources Naturelles, URAC 24, FST, Université Hassan II-Casablanca, Morocco

## Table of Contents

|                                                                      |    |
|----------------------------------------------------------------------|----|
| 1. General Procedure for the Coupling of boronic acid with Imidazole | S2 |
| 2. General Procedure for the Coupling of boronic acid with Indole    | S2 |
| 3. <sup>1</sup> H NMR Spectra of <i>N</i> -arylImidazole             | S3 |
| 4. <sup>1</sup> H NMR Spectra of <i>N</i> -arylIndole                | S9 |

1. **General Procedure for the *N*-arylation of imidazole :** In a 50 mL round-bottomed flask, imidazole (1 mmol), phenylboronic acid (1.2 mmol), K<sub>2</sub>CO<sub>3</sub> (1.5 mmol) and Fe<sub>3</sub>O<sub>4</sub>@Cu-apatite (15 mol%) were added and stirred in MeOH under air at 60°C for the required time, monitoring by TLC. After completion, the mixture was diluted with H<sub>2</sub>O and the product was extracted with EtOAc (3 times). The combined extracts were washed with brine (3 times) and dried over Na<sub>2</sub>SO<sub>4</sub>. The product was purified using column chromatography (60–120 mesh silica gels, eluting with EtOAc– hexane).
2. **General Procedure for the *N*-arylation of indole :** In a 50 mL round-bottomed flask, indole (1 mmol), phenylboronic acid (1.2 mmol), K<sub>2</sub>CO<sub>3</sub> (1.5 mmol) and Fe<sub>3</sub>O<sub>4</sub>@Cu-apatite (15 mol%) were added and stirred in MeOH under air at 60°C for the required time, monitoring by TLC. After completion, the mixture was diluted with H<sub>2</sub>O and the product was extracted with EtOAc (3 times). The combined extracts were washed with brine (3 times) and dried over Na<sub>2</sub>SO<sub>4</sub>. The product was purified using column chromatography (60–120 mesh silica gels, eluting with EtOAc– hexane).
3. **The structures of the prepared products were confirmed by <sup>1</sup>H NMR and assigned on the basis of their spectral data in comparison with those reported in the literature.**

***N*-Phenylimidazole (Table 4, entry 1) :** <sup>1</sup>H NMR (DMSO-*d*<sub>6</sub>): δ 8.36 (s, 1H), 7.88 (t, 1H), 7.46 (q, *J*= 5.8 Hz, 2H), 7.38 (t, 2H), 7.33 (t, 1H), 7.29 (s, 1H).

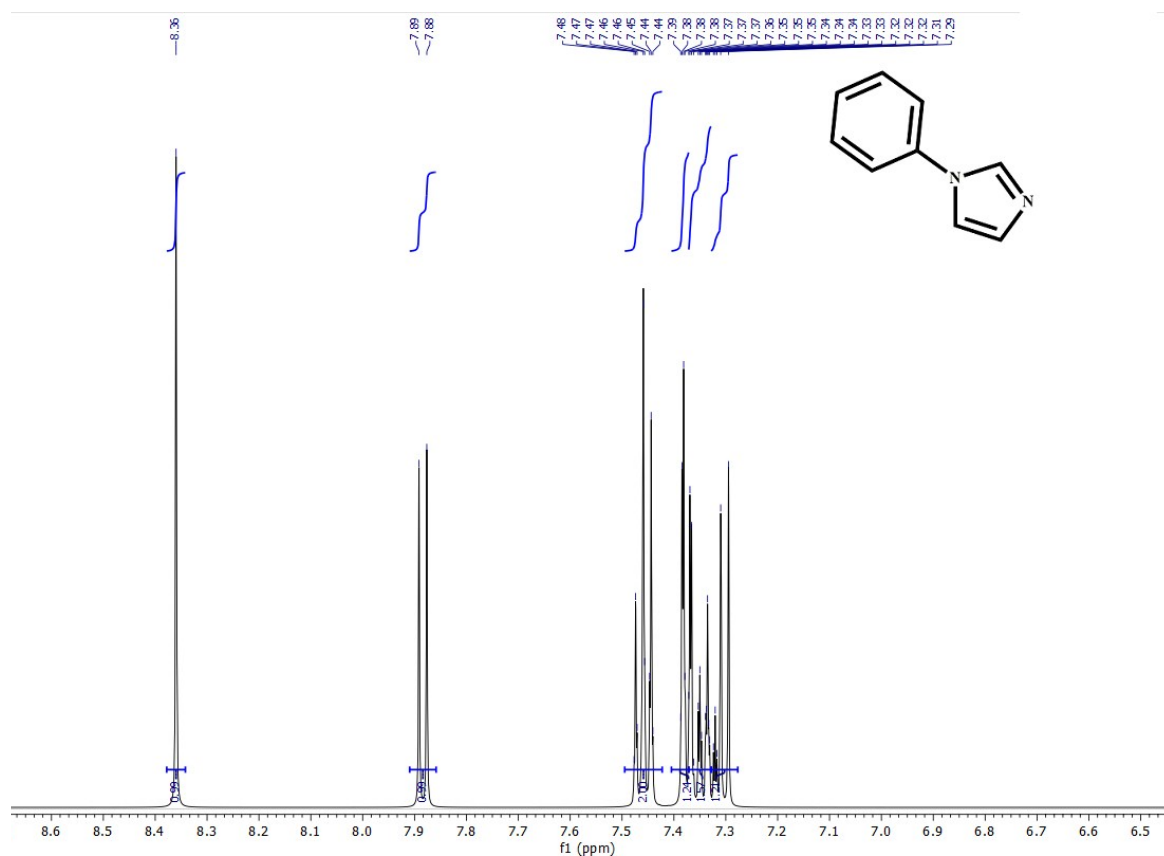

**Fig. S1:** <sup>1</sup>H NMR spectrum of the *N*-Phenylimidazole

**1-*p*-Tolyl-1*H*-imidazole (Table 4, entry 2) :** <sup>1</sup>H NMR (CDCl<sub>3</sub>): δ8.36 (s, 1H), 7.31 (s, 1H), 7.25 (d, *J*= 6.8 Hz, 2H), 7.17 (d, *J*= 7.2Hz, 2H), 7.15 (s, 1H), 2.36 (s, 3H). M/Z= 158.

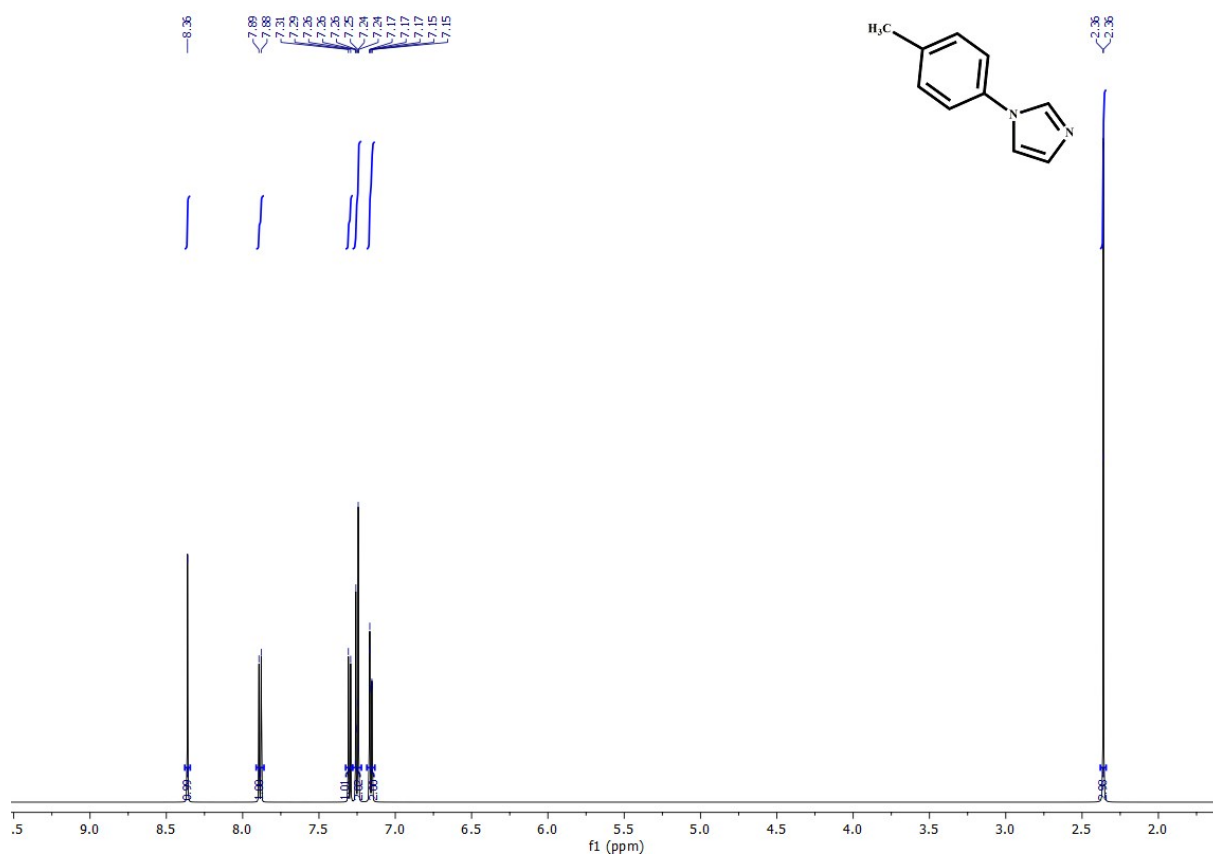

**Fig. S2:**  $^1\text{H}$  NMR spectrum of the 1-*p*-Tolyl-1*H*-imidazole

**1-*m*-Tolyl-1*H*-imidazole (Table 4, entry 3):**  $^1\text{H}$  NMR ( $\text{CDCl}_3$ , 300 MHz):  $\delta$  8.36 (s, 1H), 7.89 (s, 1H), 7.30 (s, 1H), 7.25 (t, 2H), 7.20 (t,  $J = 7.0$  Hz, 1H), 7.04 (1H, s), 2.36 (3H, s).

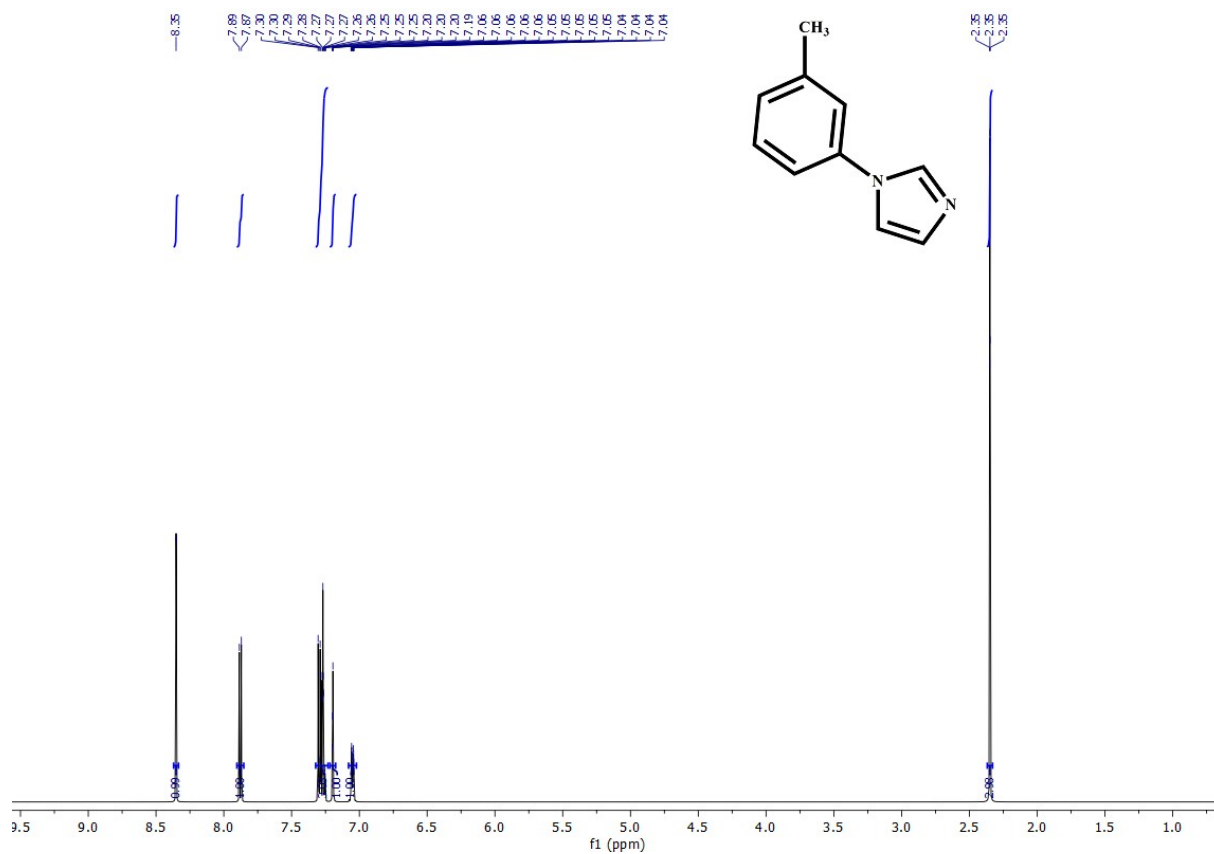

**Fig. S3:**  $^1\text{H}$  NMR spectrum of the 1-m-Tolyl-1H-imidazole

**1-ortho-Tolyl-1H-imidazole (Table 4, entry 4):**  $^1\text{H}$  NMR ( $\text{CDCl}_3$ )  $\delta$  8.32 (bs, 1H), 7.33-7.30 (m, 3H), 7.29-7.20 (m, 2H), 7.15 (bs, 1H), 2.26 (s, 3H).



**1-(4-Methoxy-phenyl)-1H-imidazole (Table 4, entry 5):**  $^1\text{H}$  NMR (DMSO- $d_6$ ):  $\delta$ 8.36 (s, 1H), 7.89 (s, 1H), 7.29 (d,  $J=8.8$  Hz, 2H), 6.96 (d,  $J=8.8$  Hz, 3H), 3.80 (s, 3H).

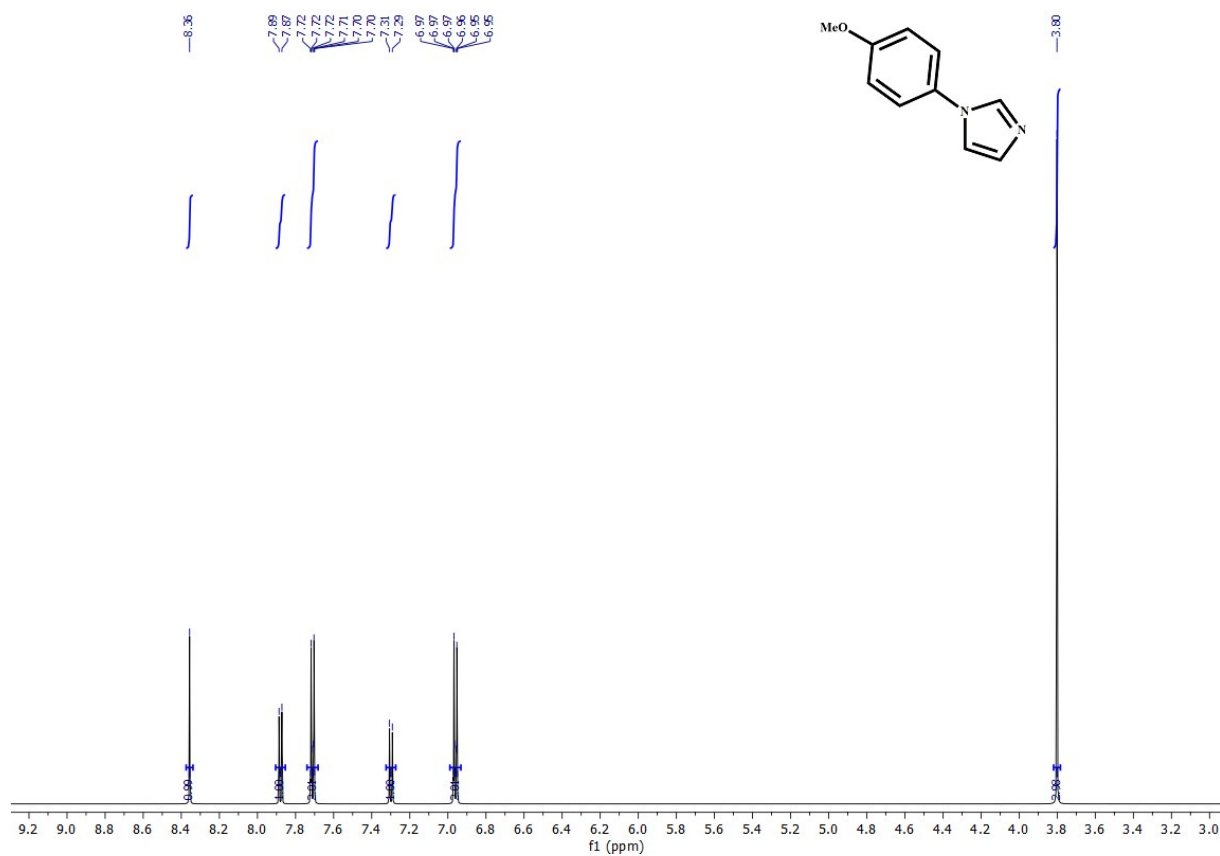

**Fig. S5:**  $^1\text{H}$  NMR spectrum of the 1-(4-Methoxy-phenyl)-1H-imidazole

**1-(4-Nitrophenyl)-1*H*-imidazole (Table 4, entry 6) :**  $^1\text{H}$  NMR ( $\text{CDCl}_3\text{-}d_6$ ):  $\delta$ 8.36-8.26 (m, 2 H), 7.89 (s, 1 H), 7.58-7.55 (m, 2 H), 7.32 (s, 1 H), 7.31 (d,  $J= 8.8$  Hz, 1 H).

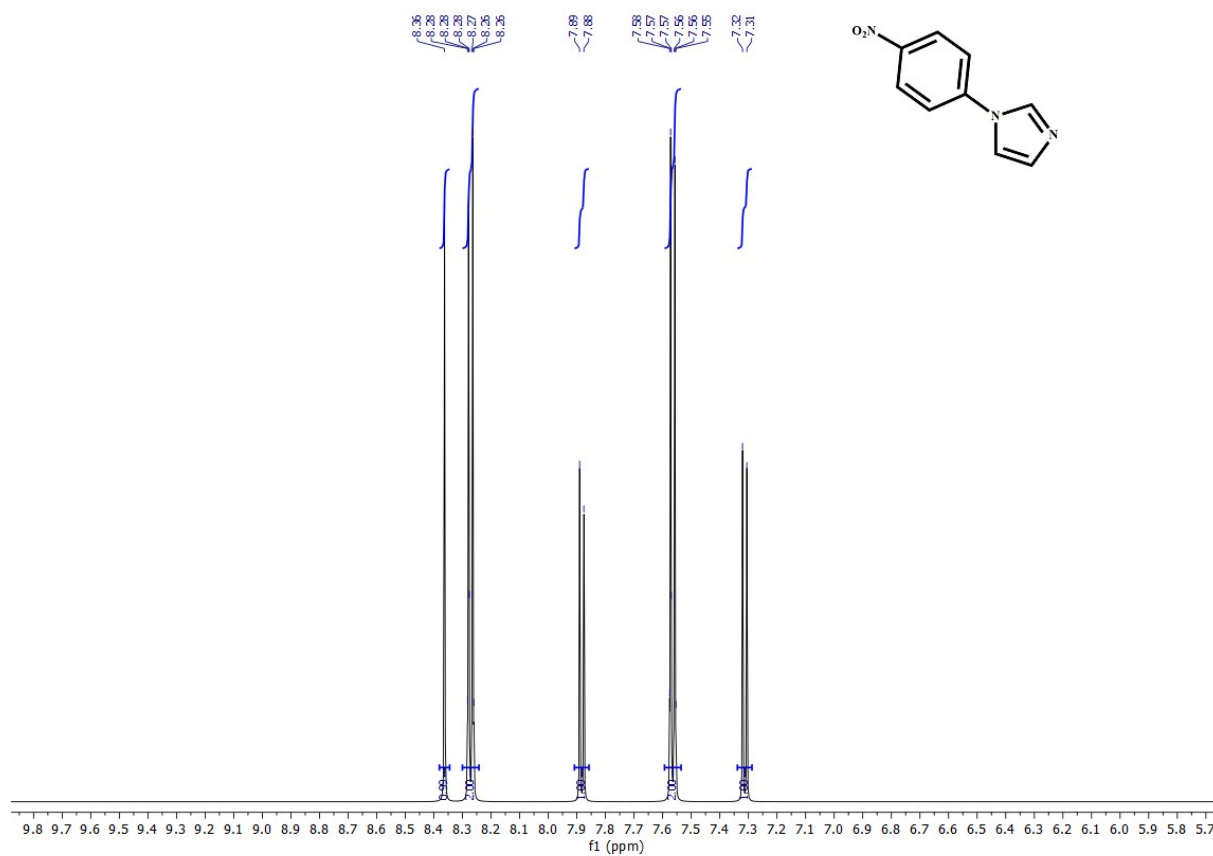

**Fig. S6:**  $^1\text{H}$  NMR spectrum of the 1-(4-Nitrophenyl)-1*H*-imidazole





**N-(4-Methylphenyl)indole (Table 4, entry 8)** :  $^1\text{H NMR}$  ( $\text{CDCl}_3$ )  $\delta$  7.76 (d, J ) 7.8 Hz, 1H), 7.70 (d, J ) 8.2 Hz, 1H), 7.60 (d, J ) 7.8 Hz, 2H), 7.36-7.34 (m, 3H), 7.23 (t, J ) 7.8 Hz, 1H), 7.18 (t, J ) 7.8 Hz, 1H), 6.69 (d, J ) 2.4 Hz, 1H), 2.36 (s, 3H).

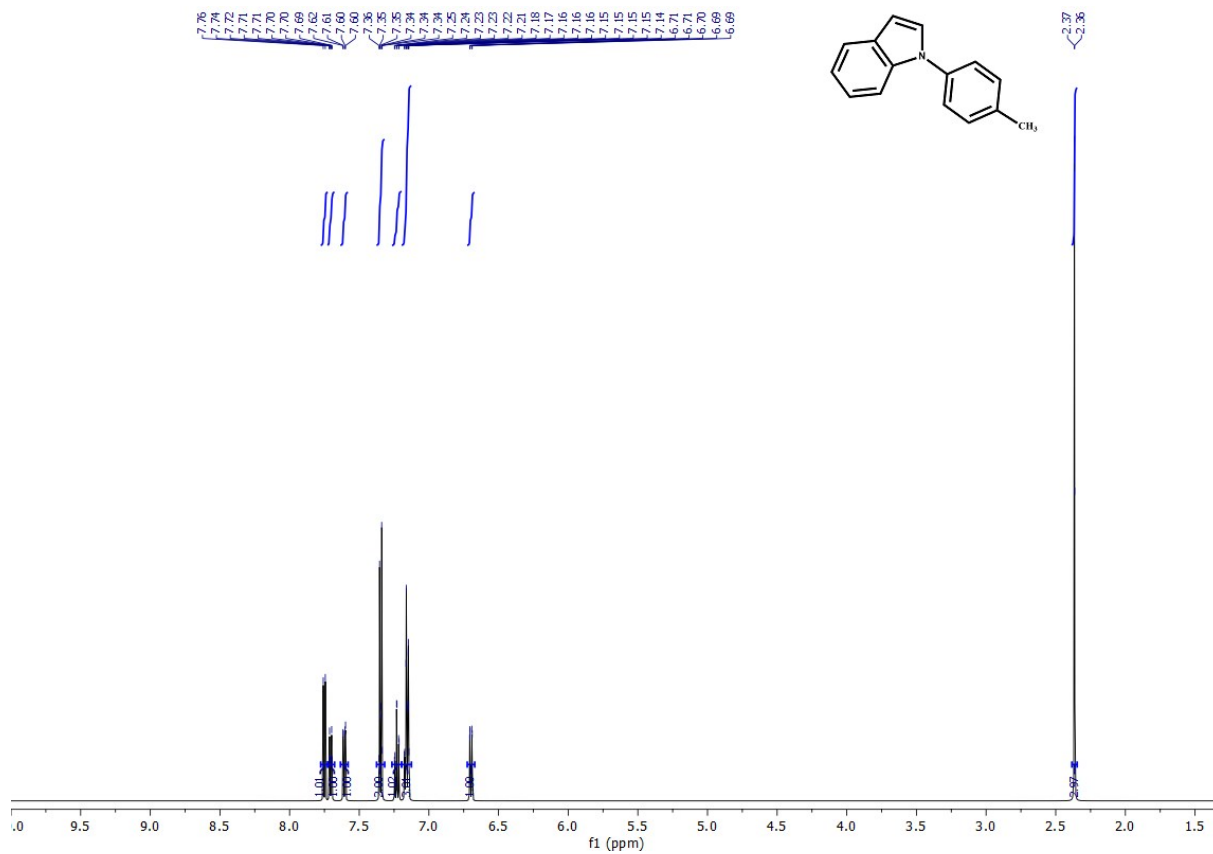

**Fig. S8:**  $^1\text{H NMR}$  spectrum of the N-(4-Methylphenyl)indole



**1-(2-Methylphenyl)indole (Table 4, entry 10):**  $^1\text{H}$  NMR ( $\text{CDCl}_3$ )  $\delta$ : 7.76—7.62 (m, 1H), 7.31—7.20 (m, 4H), 7.18—7.15 (m, 3H), 7.14—7.12 (m, 1H), 6.67 (d,  $J = 3.3$  Hz, 1H), 2.30 (s, 3H).

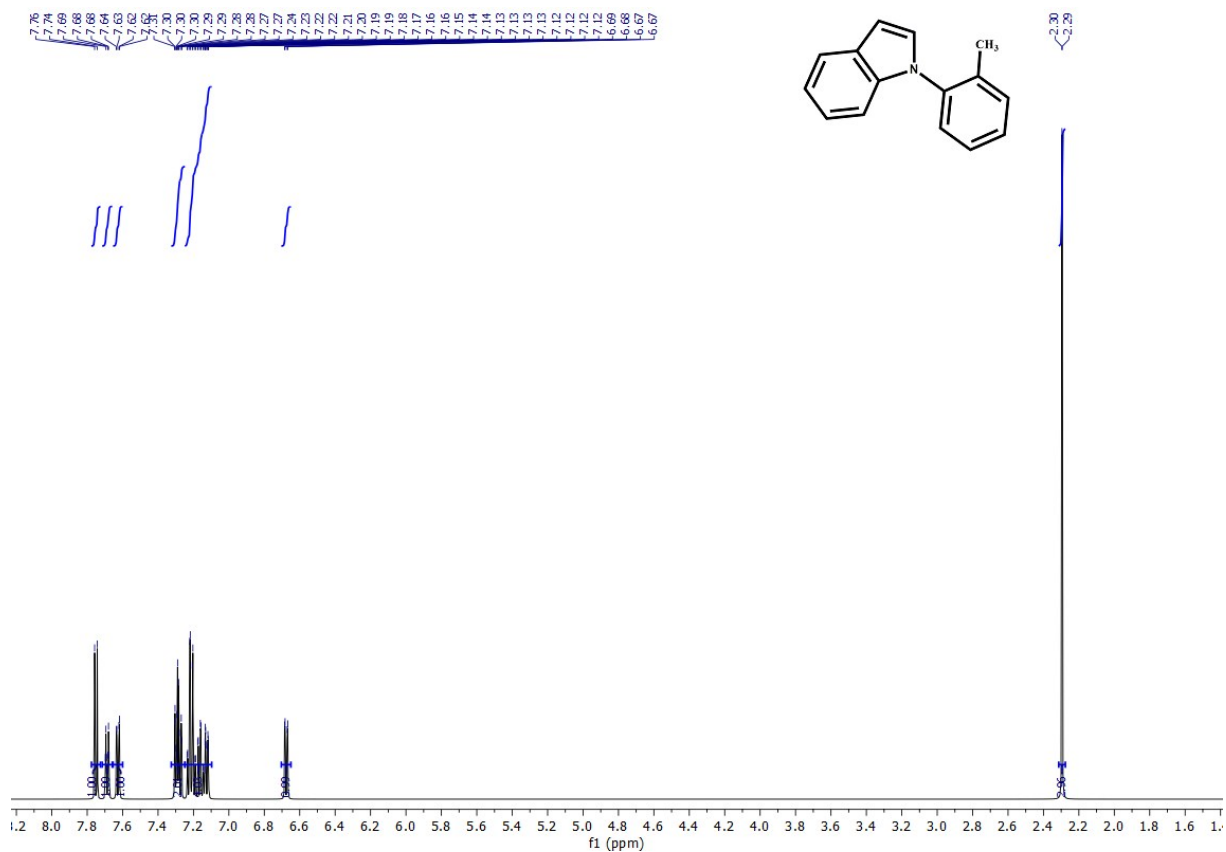

**Fig. S10:**  $^1\text{H}$  NMR spectrum of the N-(2-Methylphenyl)indole
